# Supplementary material
Source: ML conference proceedings conference paper supplement (https://openaccess.thecvf.com/content/ICCV2023/html/Yenamandra_FACTS_First_Amplify_ICCV_2023_paper.html)
Supplement: Supplementary file 1 [file Yenamandra_FACTS_First_Amplify_ICCV_2023_supplemental.zip]

# Supplementary Material for FACTS: First Amplify Correlations and Then Slice to Discover Bias

Sriram Yenamandra Pratik Ramesh Viraj Prabhu Judy Hoffman

Georgia Institute of Technology

{sriramy, pratikramesh, virajp, judy}@gatech.edu

## Contents

|                                                          |          |
|----------------------------------------------------------|----------|
| <b>1. Additional Dataset Details</b>                     | <b>1</b> |
| <b>2. FACTS: Additional analysis</b>                     | <b>1</b> |
| 2.1. GradCAM visualizations . . . . .                    | 1        |
| 2.2. CoSi Sensitivity to hyperparameters . . . . .       | 2        |
| 2.3. CoSi hyperparameter tuning and validation . . . . . | 3        |
| 2.4. Decaying weight decay schedule . . . . .            | 3        |
| 2.5. Additional qualitative examples . . . . .           | 3        |
| <b>3. FACTS: Additional comparison to prior work</b>     | <b>3</b> |
| 3.1. Domino . . . . .                                    | 3        |
| 3.2. JTT and GroupDRO . . . . .                          | 4        |
| <b>4. FACTS: Additional details</b>                      | <b>6</b> |
| 4.1. Implementation Details for CoSi . . . . .           | 6        |

## 1. Additional Dataset Details

We provide the counts of number of samples in *train*, *val* and *test* splits for our evaluation settings in Table 1. While we use standard splits for CelebA and Waterbirds proposed in prior bias mitigation work [1], we propose our own splits for NICO++, which we now describe in more detail.

**NICO++ splits.** To have a sufficient number of samples per-group, we first group concepts (eg. cats, dogs, trains, bikes) to form six super-concepts: *mammals*, *birds*, *plants*, *waterways*, *landways* and *airways*, each occurring in six contexts, giving us a total of  $6 \times 6 = 36$  groups. We then create settings where each context is spuriously correlated with a unique super-concept (e.g. *rocks* (context) and *mammals* (super-class)). This results in 6 bias-aligned and 30 bias-conflicting slices. Table 2 describes the dominant contexts for each super-class, alongwith the base NICO++ classes included in the super-class.

To generate splits, we first randomly select 50 images per each (super-concept, context) pair for creating our evaluation *test* split. For each of NICO++<sup>75</sup>, NICO++<sup>90</sup> and NICO++<sup>95</sup>, we then create a *trainval* (*train* + *val*) split.

| Setting              | <i>train</i> | <i>val</i> | <i>test</i> |
|----------------------|--------------|------------|-------------|
| Waterbirds           | 4795         | 1199       | 5794        |
| CelebA               | 162770       | 19867      | 19962       |
| NICO++ <sup>75</sup> | 9349         | 2349       | 1800        |
| NICO++ <sup>90</sup> | 8209         | 2074       | 1800        |
| NICO++ <sup>95</sup> | 7839         | 1979       | 1800        |

Table 1: Number of samples in *train*, *val* and *test* splits of our evaluation settings.

To create bias-aligned slices from the *trainval* split, we first select a super concept and its corresponding dominant concept (e.g. *mammals* and *rocks*) and retrieve all images annotated with both. Next, we select the required number of bias-conflicting samples (where the super concepts occur in *non-dominant* contexts) such that a desired correlation strength of  $\beta \in \{75, 90, 95\}$  is ensured for each NICO++ <sup>$\beta$</sup>  setting. Finally, we divide the train-val split uniformly at random in an 80-20 ratio to form the *train* and *val* splits respectively. Table 3 shows the resulting train distribution of classes and contexts for NICO++<sup>90</sup>.

## 2. FACTS: Additional analysis

### 2.1. GradCAM visualizations

We generate GradCAM visualizations [2] to investigate the region of interest of the standard ERM model  $h_s$  and the bias-amplified model  $h_{\text{AmCo}}$  across the bias-conflicting samples. Figure 1 displays some of the samples belonging to the bias-conflicting slices which were correctly classified using the ERM model. We observe that  $h_s$  focuses on features associated with the target label, whereas  $h_{\text{AmCo}}$  focuses on features associated with the spurious attribute. We also observe that  $h_{\text{AmCo}}$  mispredicts the samples as the class that is correlated with the spurious attribute.

| Super-concept | NICO++ concepts                                                                                                  | Dominant context |
|---------------|------------------------------------------------------------------------------------------------------------------|------------------|
| mammals       | sheep, wolf, lion, fox, elephant, kangaroo, cat, rabbit, dog, monkey, squirrel, tiger, giraffe, horse, bear, cow | rock             |
| birds         | bird, owl, goose, ostrich                                                                                        | grass            |
| plants        | flower, sunflower, cactus                                                                                        | dim lighting     |
| landways      | bicycle, motorcycle, train, bus, scooter, truck, car                                                             | autumn           |
| waterways     | sailboat, ship, lifeboat                                                                                         | water            |
| airways       | hot air balloon, airplane, helicopter                                                                            | outdoor          |

Table 2: **NICO++ split details.** We list super-concepts that we use as target labels and their corresponding base concepts from the original NICO++ dataset. Each super-concept co-occurs with six different contexts. In our proposed train and validation splits, each context *dominantly* co-occurs with a unique super-concept (*e.g. rocks* and *mammals*) .

| Contexts \ Classes | Classes |       |        |         |           |          |
|--------------------|---------|-------|--------|---------|-----------|----------|
|                    | mammals | birds | plants | airways | waterways | landways |
| rock               | 2552    | 50    | 50     | 50      | 50        | 50       |
| grass              | 24      | 1280  | 24     | 24      | 24        | 24       |
| dim lighting       | 12      | 12    | 616    | 12      | 12        | 12       |
| outdoor            | 16      | 16    | 16     | 879     | 16        | 16       |
| water              | 20      | 20    | 20     | 20      | 1063      | 20       |
| autumn             | 21      | 21    | 21     | 21      | 21        | 1104     |

Table 3: **NICO++ split distribution.** Distribution of samples for each (super-concept, context) pair in the *train* split of NICO++<sup>90</sup>.

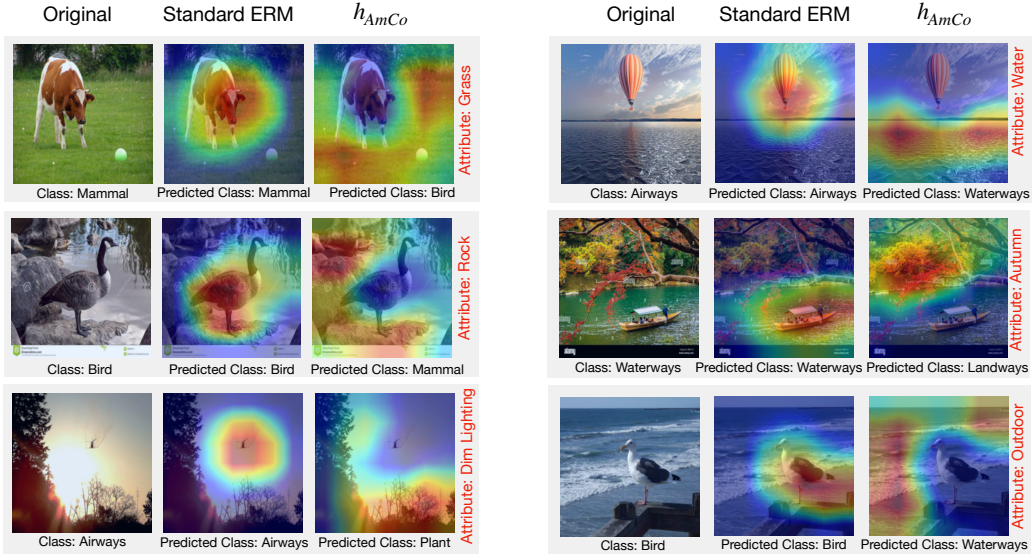

Figure 1: GradCAM [2] visualizations of bias-conflicting samples which were correctly classified by the ERM model. We see that the bias-amplified model  $h_{AmCo}$  makes predictions focusing on the features associated with the spurious attribute, whereas the standard ERM model is able to learn some of the features associated with the target label.

## 2.2. CoSi Sensitivity to hyperparameters

For the NICO++<sup>95</sup> setting, we find  $\alpha = 0.25$ ,  $\Sigma_p \cong full$  and  $\delta_p = 10^{-3}$  to result in the best Silhouette coeffi-



cient [3]. In Table 4, we vary the different hyperparameters used in the second stage of our approach. First, we vary the value of  $\alpha$  - the weight assigned to the *correlation prior* in the log-likelihood (Section 3.2). Next, we change the covariance type of  $\Sigma_p$ , the covariance of the multivariate normal distribution used to model the *correlation prior*. We find that restricting covariance to *diagonal* drops the Precision@10 to 0.53 from 0.62, while restricting all mixture components to have a *tied* covariance matrix drops the Precision@10 to 0.58. Finally, fitting the mixture model using the logits from our bias-amplified ERM model  $h_{\text{AmCo}}$  to a standard ERM model drops the Precision@10 to 0.36.

| Ablation                                                                   | Precision@10 |
|----------------------------------------------------------------------------|--------------|
| $\alpha = 25$ , $\Sigma_p \cong \text{full}$ , $\delta_p = 10^{-3}$ (ours) | <b>0.62</b>  |
| $\alpha = 10$                                                              | 0.57         |
| $\alpha = 50$                                                              | 0.53         |
| $\Sigma_p \cong \text{diagonal}$                                           | 0.53         |
| $\Sigma_p \cong \text{tied}$                                               | 0.58         |
| $\delta_p = 10^{-5}$                                                       | 0.57         |
| $\delta_p = 10^{-4}$                                                       | <b>0.62</b>  |
| $\delta_p = 10^{-2}$                                                       | 0.49         |
| Using standard ERM                                                         | 0.36         |

Table 4: **Ablating CoSi hyperparameters.** Results on NICO++<sup>95</sup>.

### 2.3. CoSi hyperparameter tuning and validation

In Figure 2, we show how the use of Silhouette coefficient [3] results in selection of hyperparameters achieving good Precision@10 in the NICO++<sup>95</sup> setting. The Silhouette coefficient measures how well separated different clusters are in the embedding space. We compute the mean of Silhouette coefficients obtained in the embedding spaces of CLIP [4] and model predictions.

### 2.4. Decaying weight decay schedule

Our current method requires training multiple models with different weight decays for finding the right capacity of model needed. Here, we explore varying the weight decay in a single training run and then picking the model that achieves highest average variation in per-class confidences. Specifically, we decay the weight decay exponentially from 2.0 to  $10^{-3}$  over the course of training. While this simple strategy results in training of far lesser models, we find that this doesn’t result in consistent gains in the more difficult NICO++ settings.

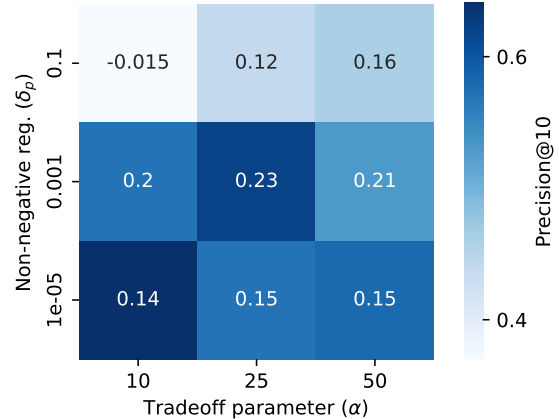

Figure 2: **Validation of CoSi hyperparameter selection strategy.** We plot the Precision@10 (color, darker is higher) as the hyperparameters in CoSi ( $\delta_p$  and  $\alpha$ ) vary along with the values of Silhouette coefficients (inscribed values). We select  $\delta_p = 0.001$  and  $\alpha = 25$  that result in the highest value of Silhouette coefficient.

| Identification | Waterbirds  | CelebA      | NICO++ <sup>90</sup> | NICO++ <sup>95</sup> |
|----------------|-------------|-------------|----------------------|----------------------|
| AmCo           | 0.58        | 0.29        | <b>0.41</b>          | <b>0.31</b>          |
| wd schedule    | <b>0.63</b> | <b>0.31</b> | 0.35                 | 0.30                 |

Table 5: Comparison of methods in terms of Avg-AP for retrieving bias-conflicting samples across evaluation settings.

## 2.5. Additional qualitative examples

In Figs. 3-12 we present additional qualitative examples of slices discovered by FACTS on the CelebA, Waterbirds, and NICO++ settings. We present the top-6 slices after ranking the slices based on model’s performance on the slice. We report model’s accuracy on each slice at the top.

## 3. FACTS: Additional comparison to prior work

### 3.1. Domino

- Our method makes use of a bias-amplified ERM model  $h_{\text{AmCo}}$  instead of the standard ERM model  $h_b$ . This helps increase the separation between the bias-aligned and bias-conflicting samples belonging to a particular class (validated in Section 4.5).
- Our method makes use of richer prior in the form of logits  $h_{\text{AmCo}}(X)$  produced by the bias-amplified model instead of the categorical assignment of the predicted class label  $\hat{Y} = \text{argmax}(h_b(X))$  using a standard ERM model.

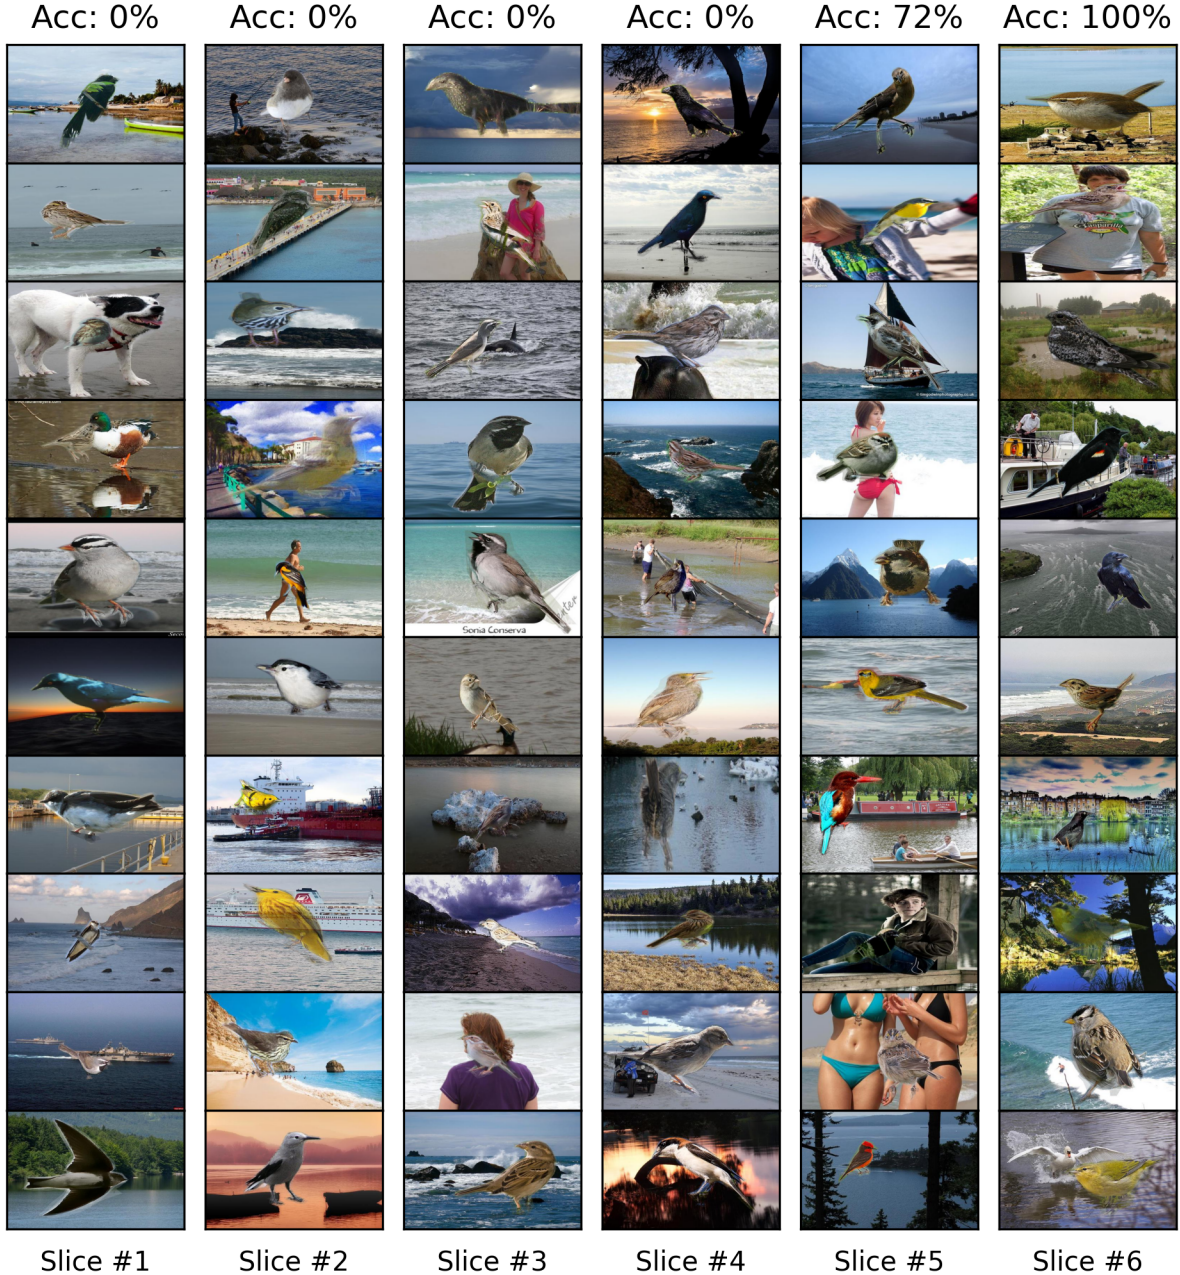

Figure 3: Top-6 slices retrieved by FACTS for the *landbirds* class from Waterbirds. All these slices predominantly contain the bias-conflicting slices: *landbirds* in *water* backgrounds.

- Lastly, [5] clusters samples across all classes together and separates them by enforcing a soft constraint on the class membership. It does this by jointly modelling its mixture model with class information using the term  $P(\hat{Y} = h_s(x_i) | S^{(j)} = 1)$ . We found enforcing a hard constraint helps prevent any inter-class contamination of slices.

We summarize the differences with Domino [5] in Table 6.

### 3.2. JTT and GroupDRO

Prior mitigation works [6, 1] use high regularization and low learning rates to achieve good worst group performance. Also, [6] observes high weight decay to increase the accuracy gap between bias-aligned and bias-conflicting



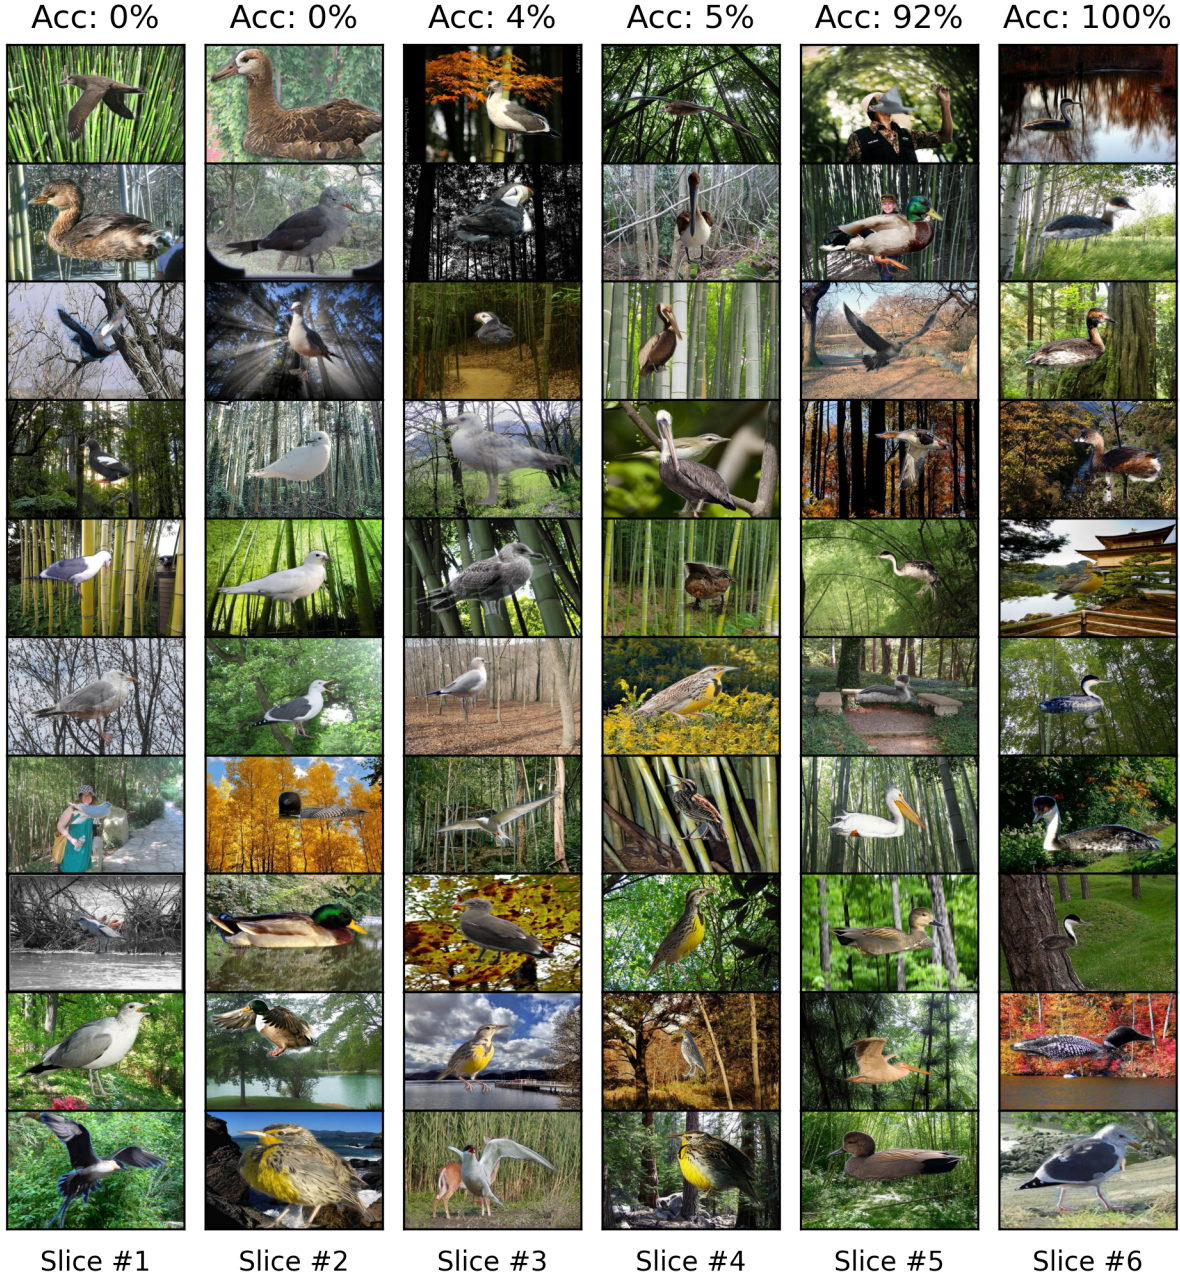

Figure 4: Slices retrieved by FACTS for the *waterbirds* class from Waterbirds. The samples in these discovered slices are predominantly belong to the bias-conflicting slice of *waterbirds* in *land* backgrounds.

| Criterion     | FACTS                      | DOMINO                         |
|---------------|----------------------------|--------------------------------|
| Amplification | High $l_2$ reg.            | Standard $l_2$ reg.            |
| Prior         | Bias amplified logits      | Cat. assignment of pred. label |
| Clustering    | Per-class, hard assignment | Global, soft assignment        |

Table 6: Comparing FACTS to DOMINO.

groups. In this work, we exploit this observation for better separating bias-aligned and bias-conflicting groups for the purpose of identifying spurious correlations.



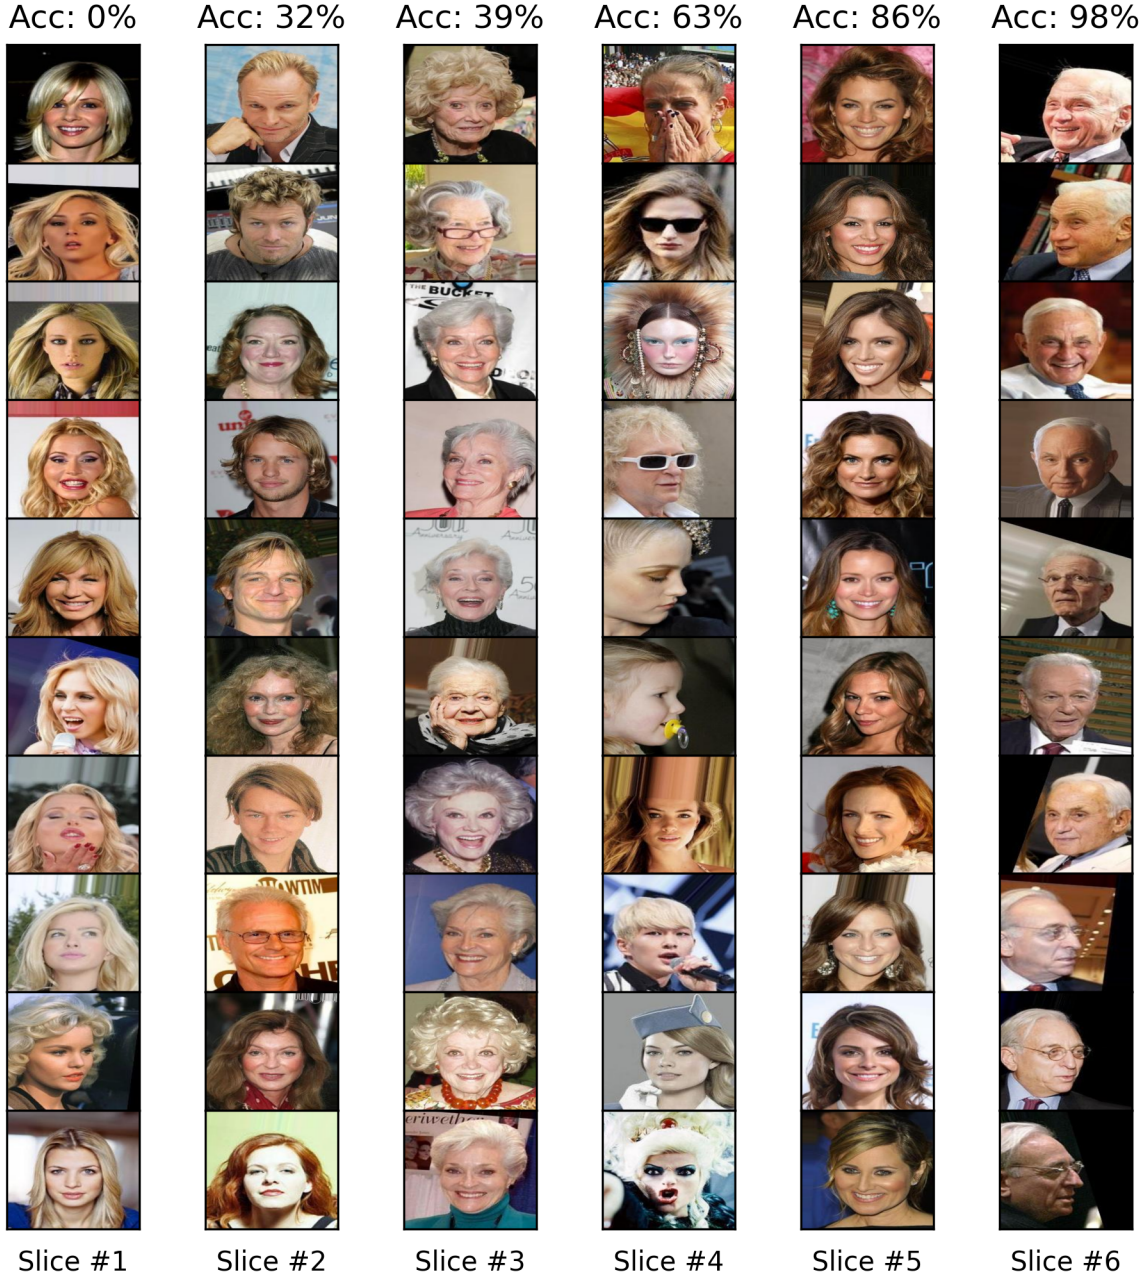

Figure 5: Slices retrieved by FACTS for the *non-blonde* (dark-haired or gray-haired) class of celebrity faces from CelebA. Note that although this class doesn’t have a *bias-conflicting* slice, FACTS is able to recover coherent slices with degraded performance.

## 4. FACTS: Additional details

### 4.1. Implementation Details for CoSi

In the second stage of our approach, we first initialize the slices using the model’s confusion matrix over validation data following [5], wherein samples with identical pre-

dictions are assigned to the same slices. We fit 36 mixture components per-class. Once the mixture model is fit, we assign each sample to the slice under which the sample achieves the highest density, and rank samples within a slice in order of this density. Finally, we rank slices using model performance and report top-6 slices.

For generating captions and keywords for slices (in Fig.

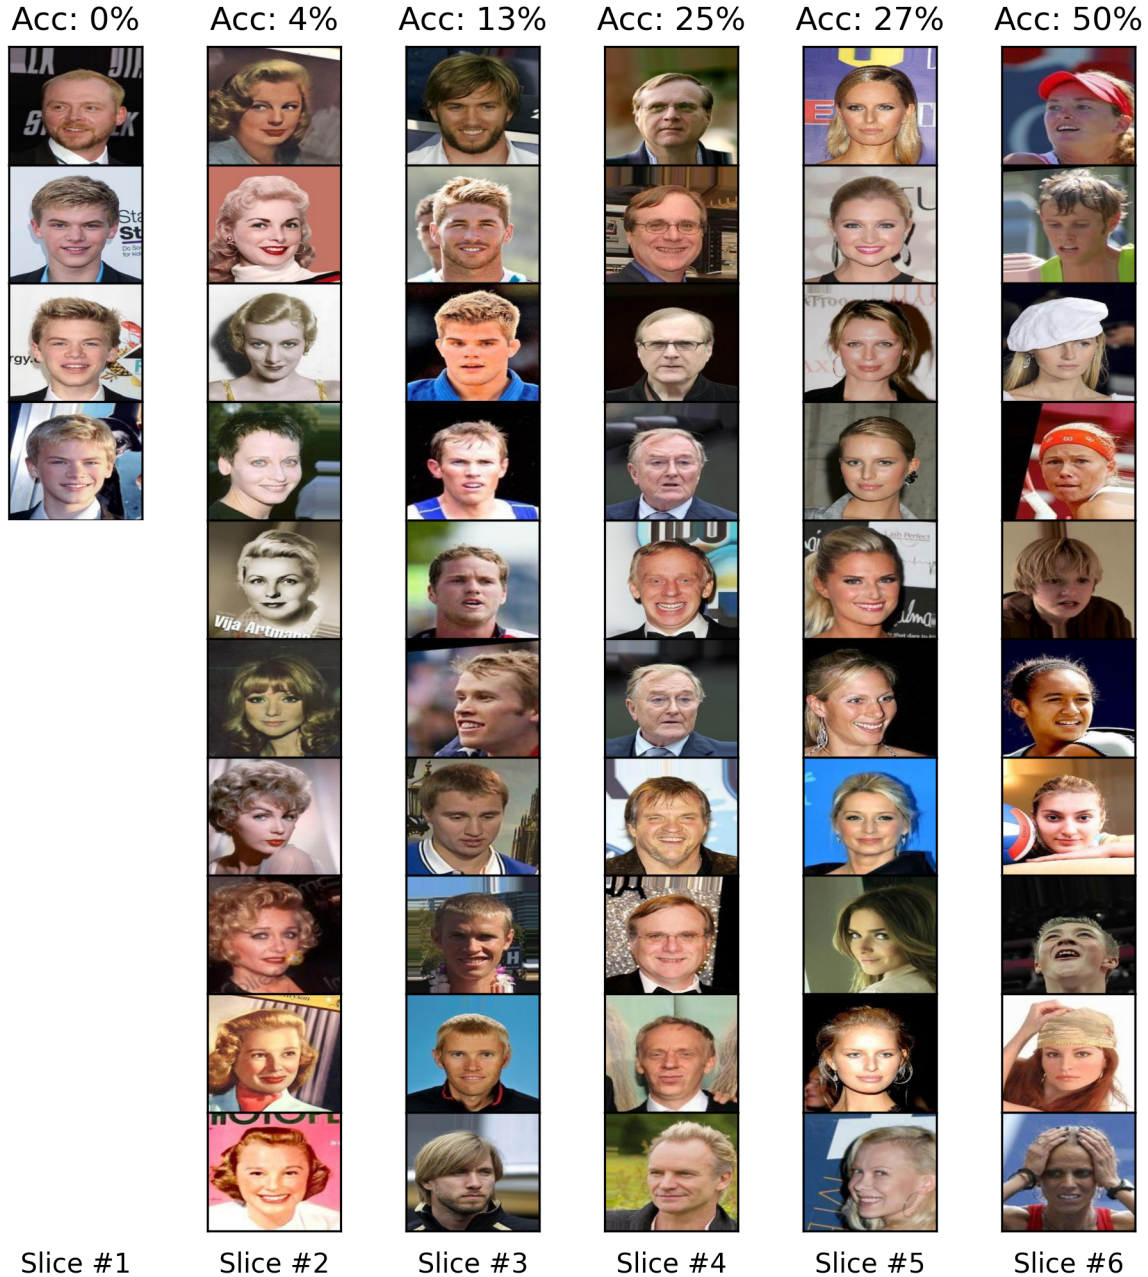



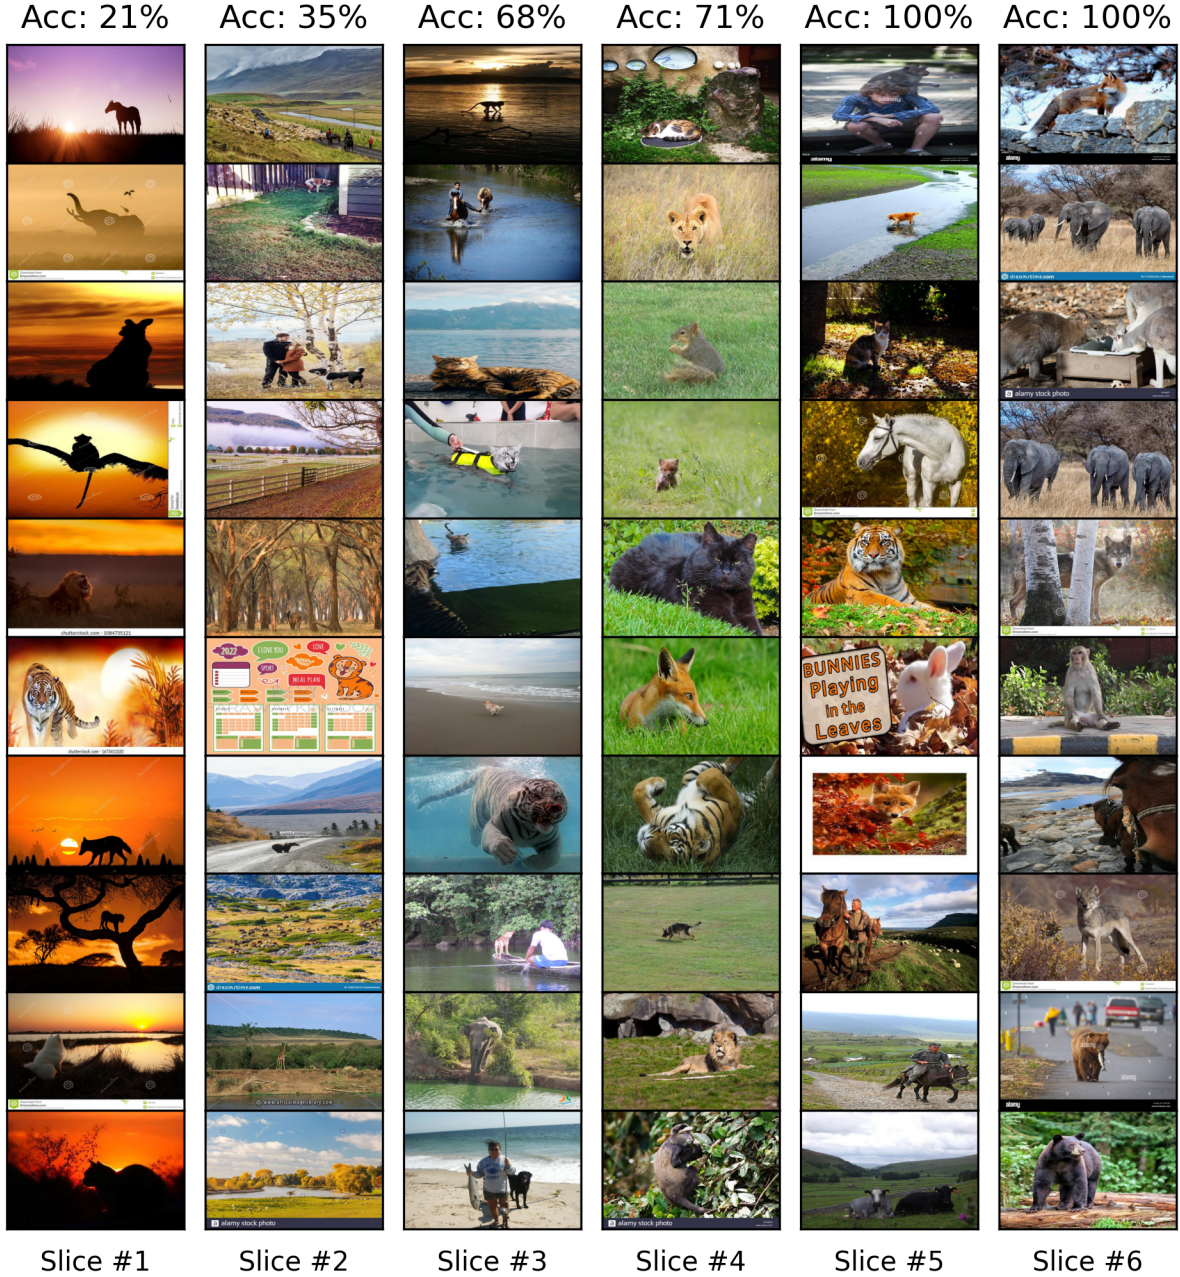

Figure 7: Slices retrieved by FACTS for the *mammals* class from NICO++<sup>90</sup>. Note that the dominant context for *mammals* is *rocks*.

24 Jul 2021. 1, 4

- [2] Ramprasaath R Selvaraju, Michael Cogswell, Abhishek Das, Ramakrishna Vedantam, Devi Parikh, and Dhruv Batra. Grad-cam: Visual explanations from deep networks via gradient-based localization. In *Proceedings of the IEEE international conference on computer vision*, pages 618–626, 2017. 1, 2
- [3] Peter J Rousseeuw. Silhouettes: a graphical aid to the interpretation and validation of cluster analysis. *Journal of com-*

*putational and applied mathematics*, 20:53–65, 1987. 3

- [4] Alec Radford, Jong Wook Kim, Chris Hallacy, Aditya Ramesh, Gabriel Goh, Sandhini Agarwal, Girish Sastry, Amanda Askell, Pamela Mishkin, Jack Clark, et al. Learning transferable visual models from natural language supervision. In *International conference on machine learning*, pages 8748–8763. PMLR, 2021. 3
- [5] Sabri Eyuboglu, Maya Varma, Khaled Kamal Saab, Jean-



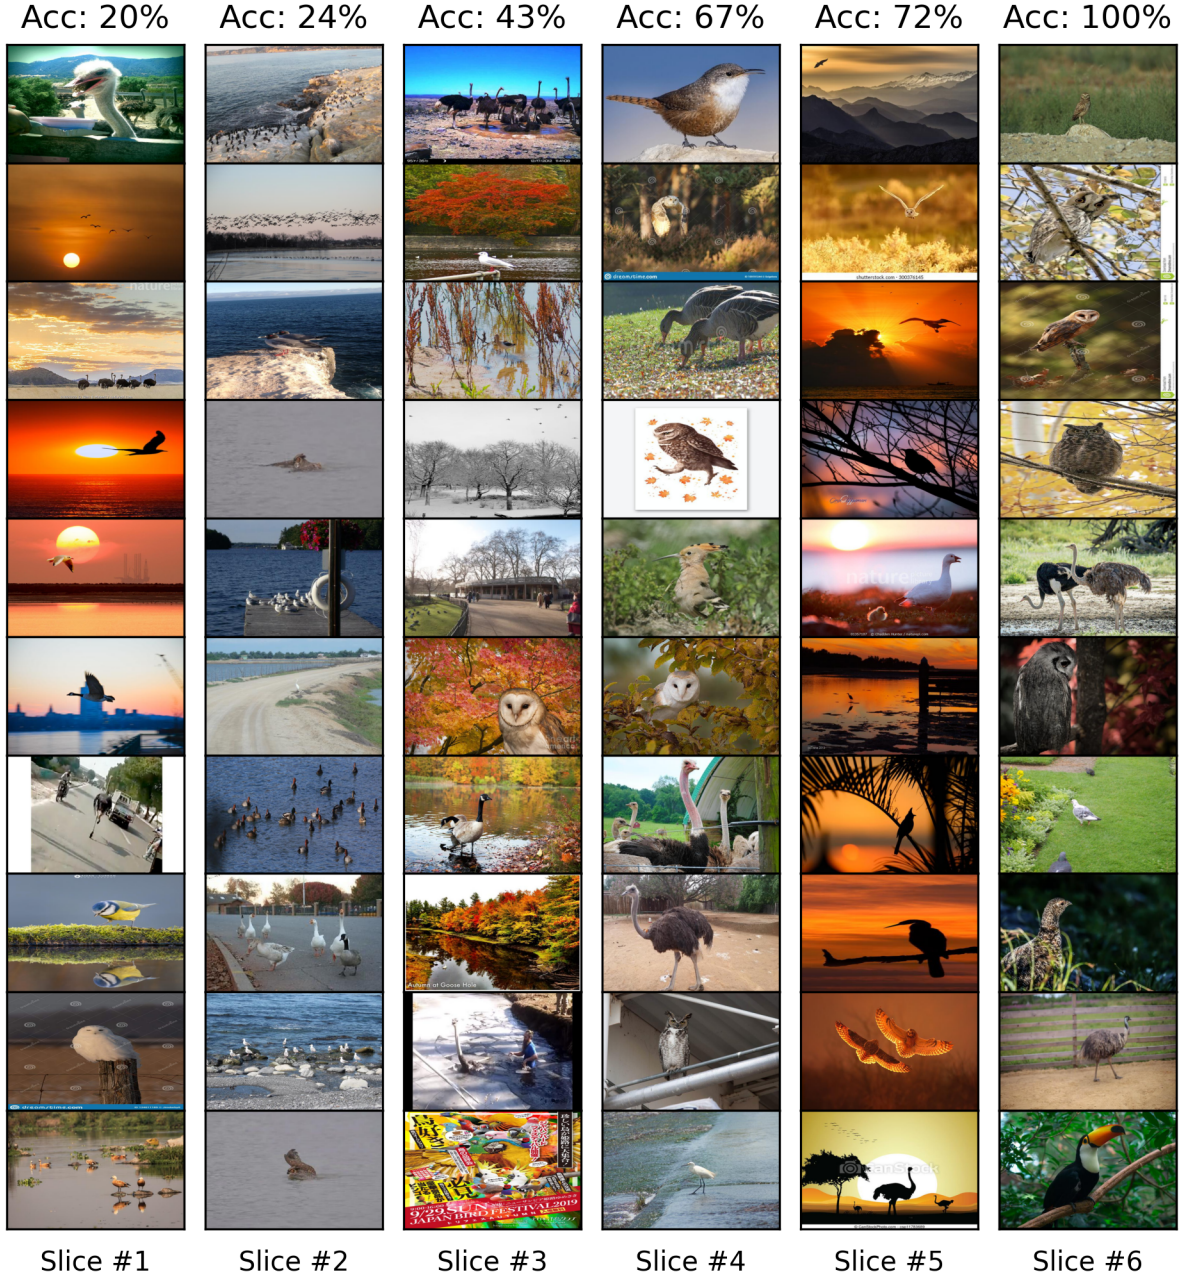



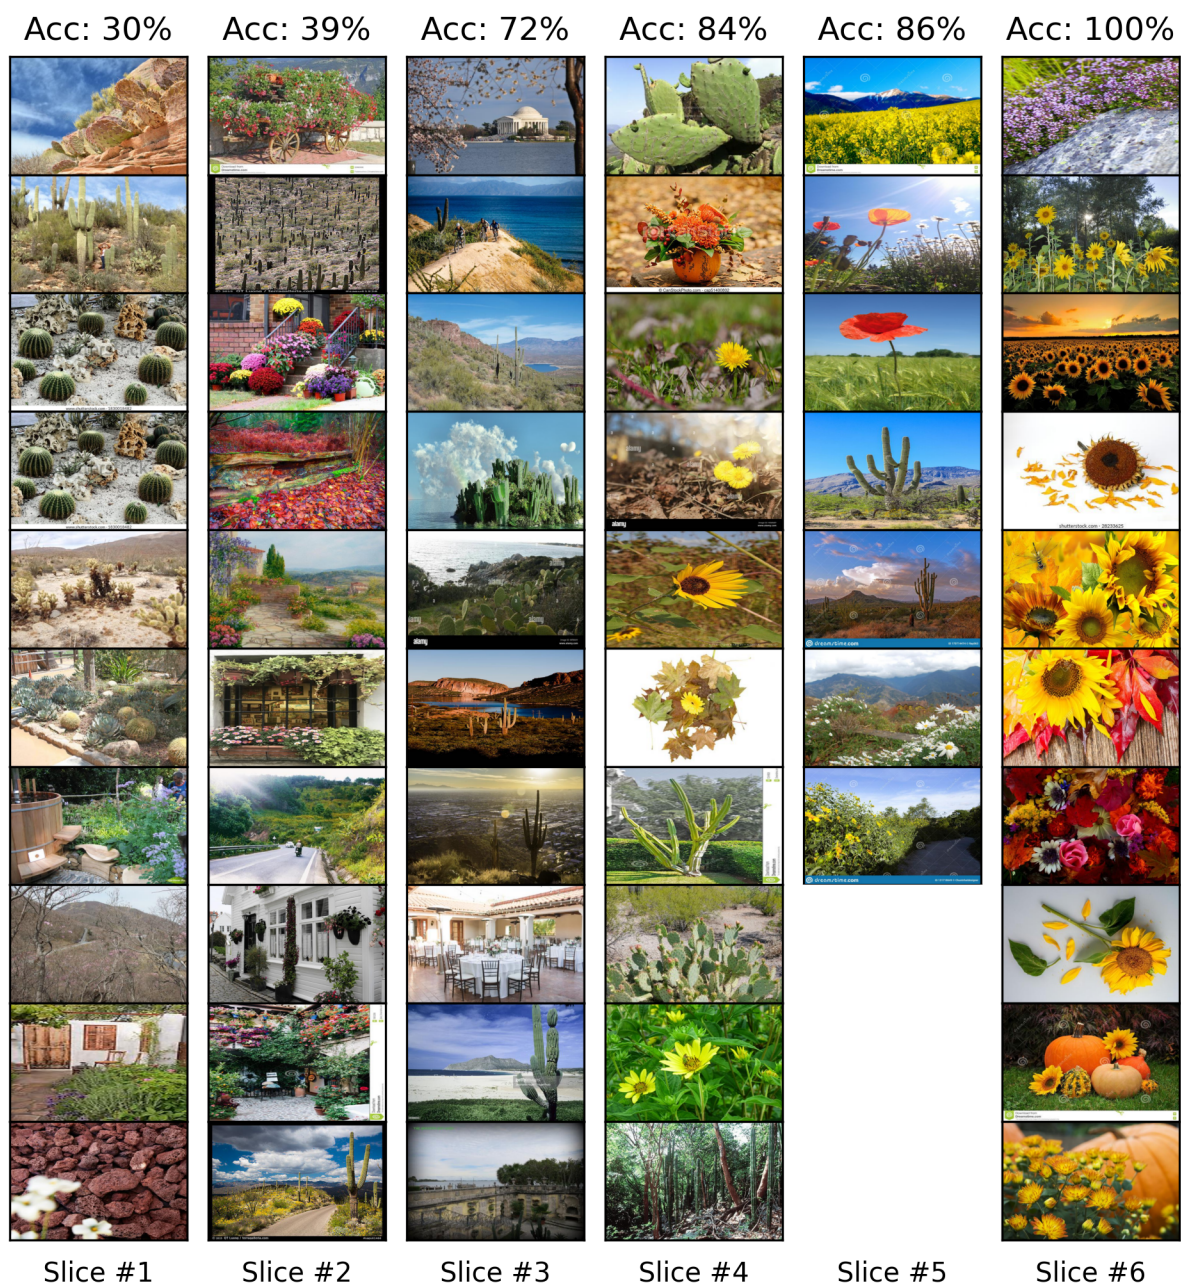



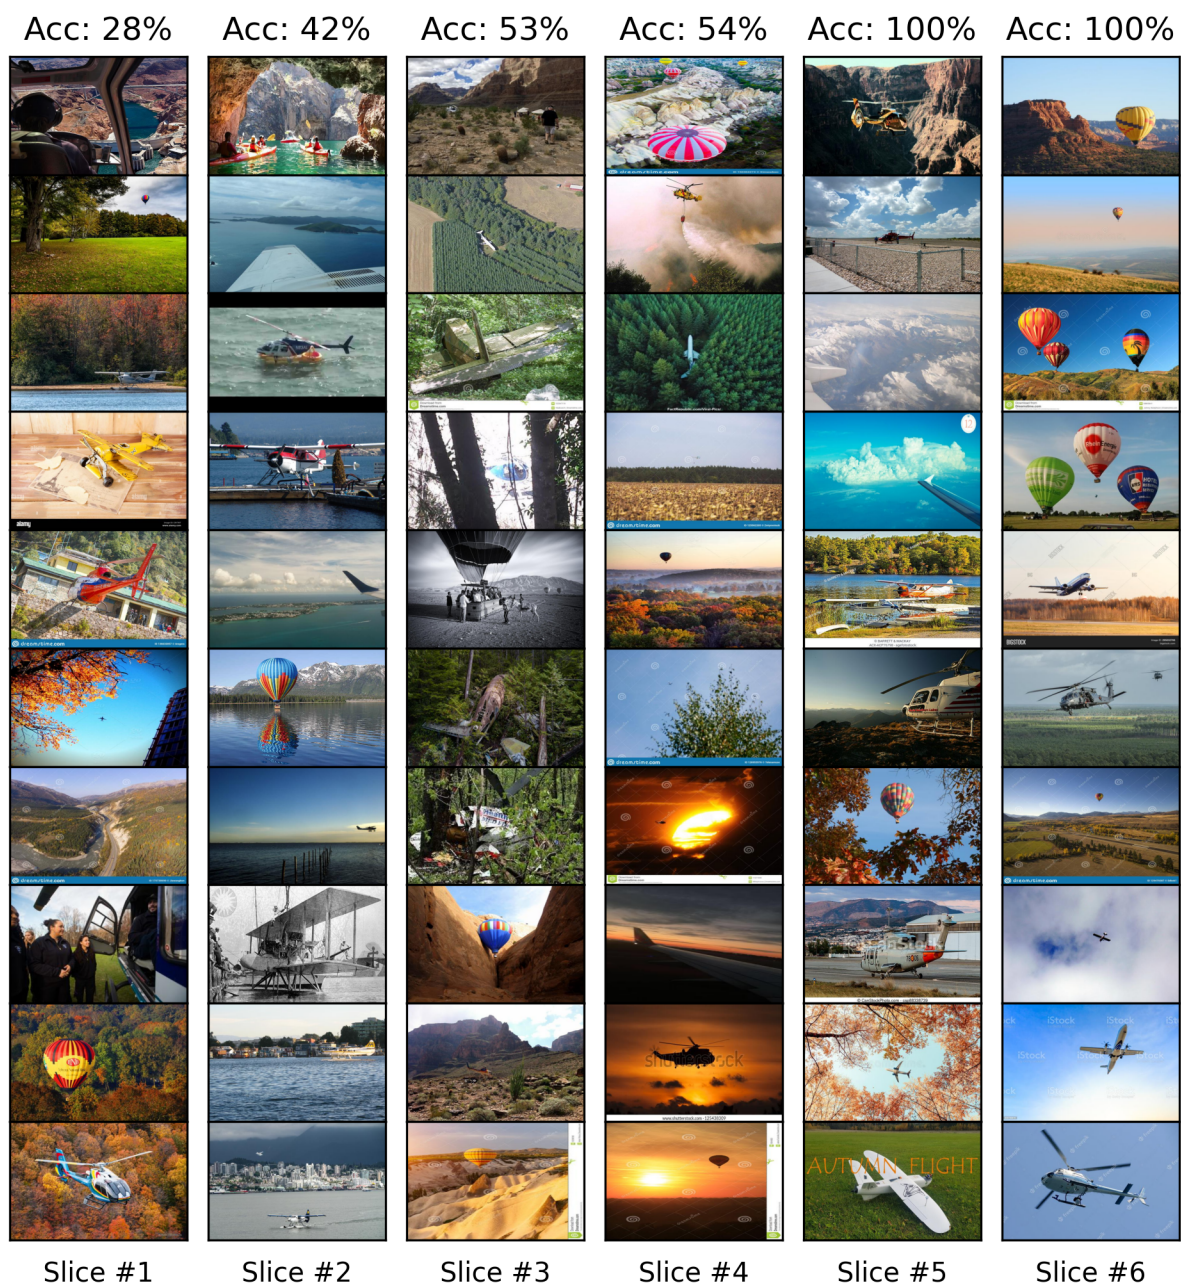

Figure 10: Slices retrieved by FACTS for the *airways* class from NICO++<sup>90</sup>. Note that the dominant context for *airways* is *outdoor*.



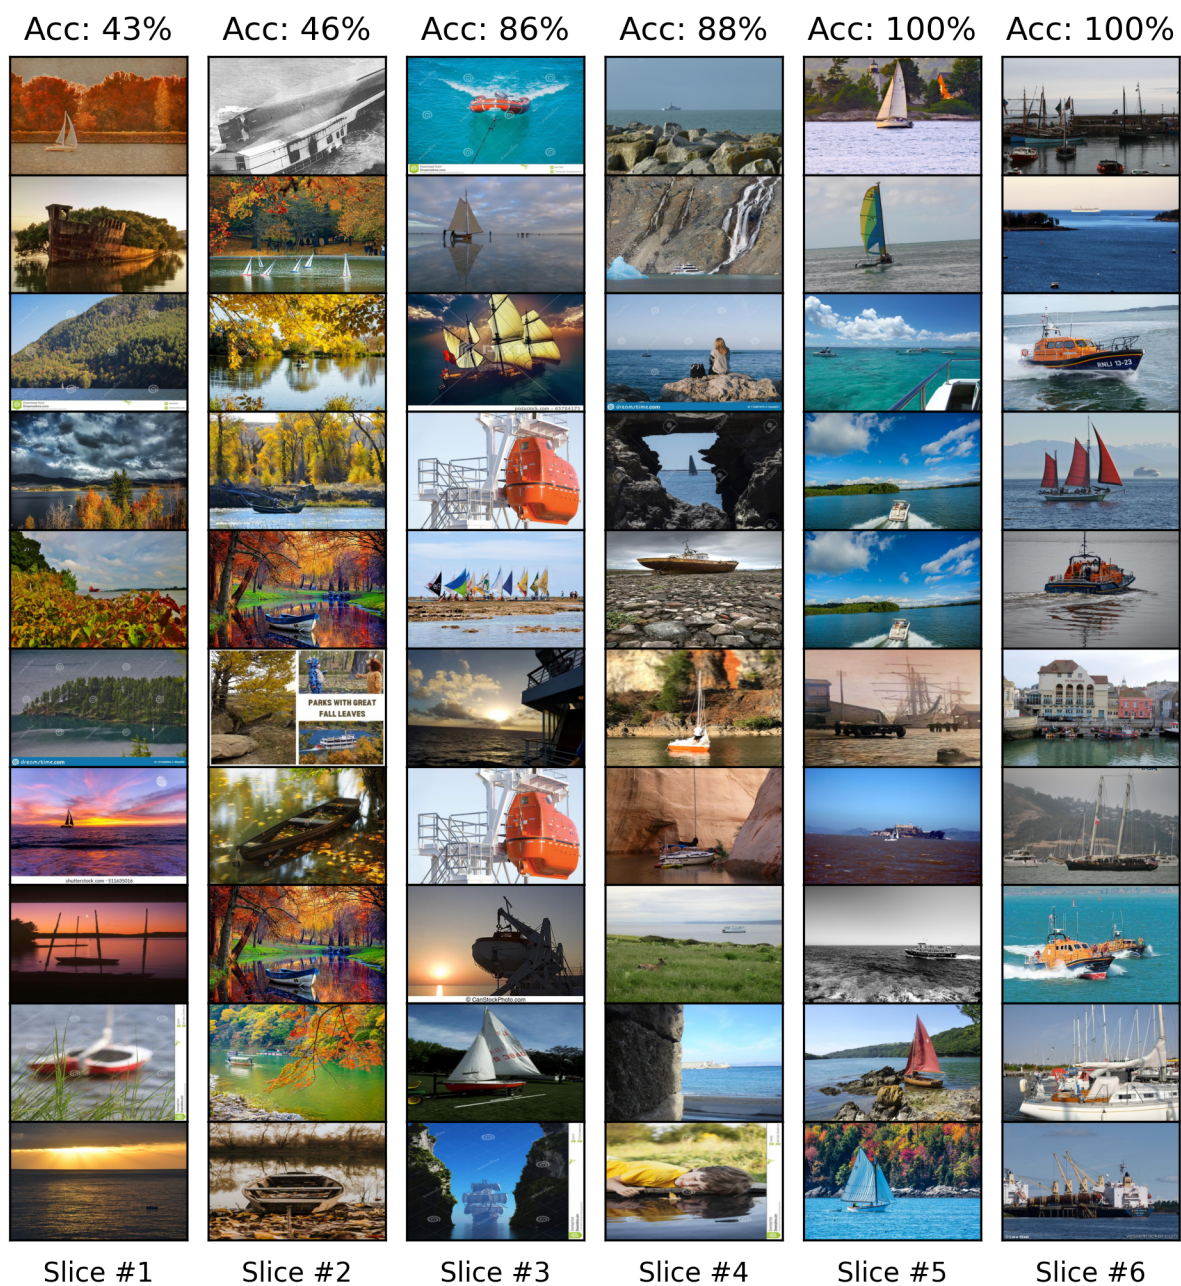

Figure 11: Slices retrieved by FACTS for the *waterways* class from NICO++<sup>90</sup>. Note that the dominant context for *waterways* is *water*.



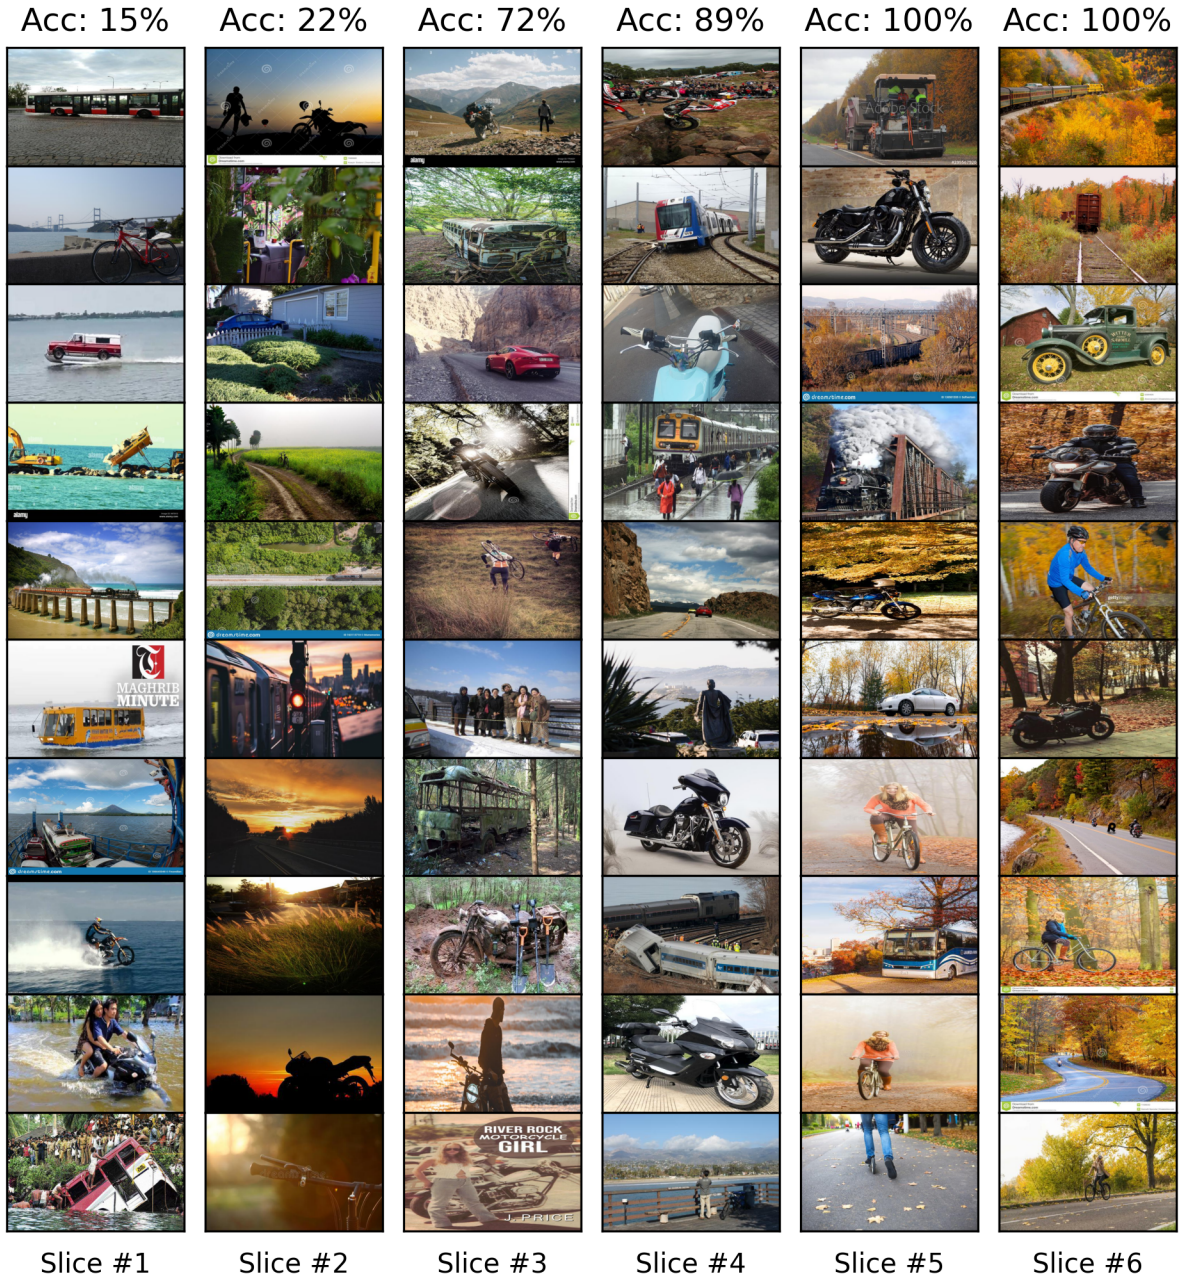

Figure 12: Slices retrieved by FACTS for the *landways* class from NICO++<sup>90</sup>. Note that the dominant context for *landways* is *autumn*.
